# Supplementary material for: 9005 陸上競技・4×100mリレーのタイムに影響をおよぼす諸要因 : バトン受け走者のスタート加速法について(9.体育方法,一般研究)
Source: Hindawi journal article supplement (doi:10.1155/2018/4827643), 1984-10-18
Supplement: f1 [file 4827643.f1.pdf]

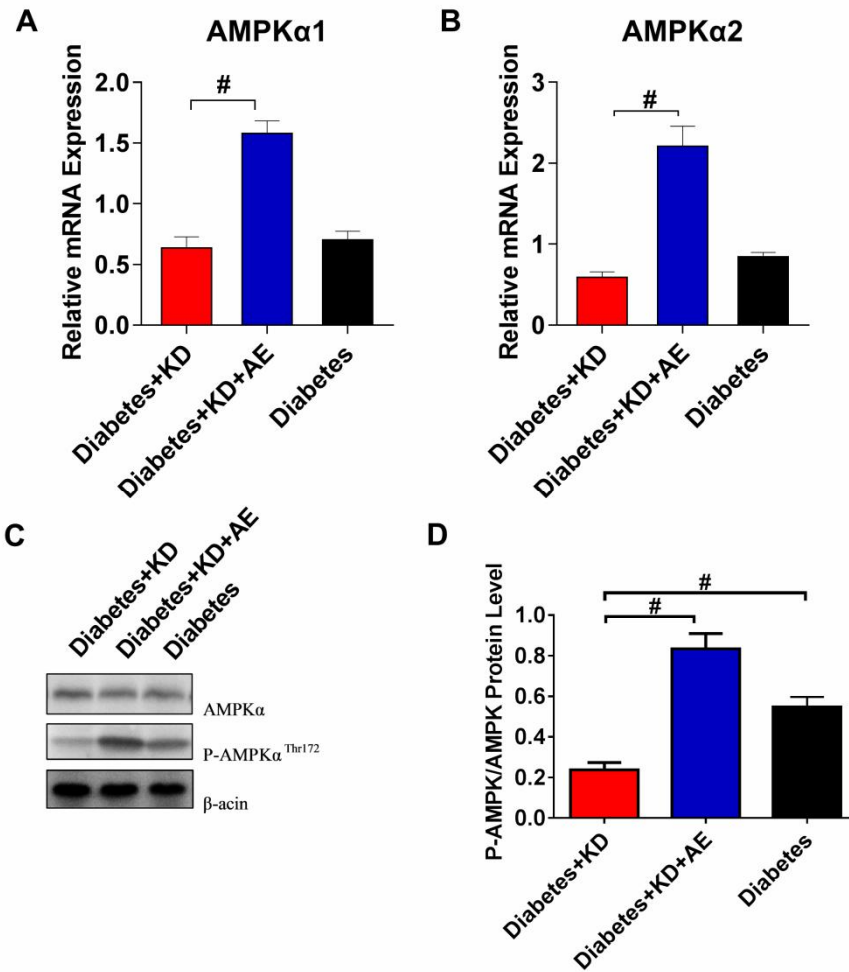

**Supplementary Figure 1:** AMPK $\alpha$ 1 (A) & AMPK $\alpha$ 2 (B) levels in mouse livers of diabetic group, diabetes+KD and diabetes+KD+AE group. AMPK protein expression and activity were shown below (C and D). Data were presented as means $\pm$ SEM (n=6 per group) and statistical analysis was performed with 1-way ANOVA, #P<0.05 vs. Diabetes + KD group.

**Supplemental Table 1: Ingredient composition of diets**

| g/100 g total diet     | Chow diet | High-fat-diet | ketogenic Diet |
|------------------------|-----------|---------------|----------------|
| Fish guano             | 4         | 2.18          | -              |
| Soybean meal           | 22        | 12.01         | -              |
| Corn                   | 25        | 13.65         | -              |
| Wheat                  | 34        | 18.56         | -              |
| Soybean                | 2         | 1.09          | -              |
| Bran                   | 4         | 2.18          | -              |
| Yeast                  | 2.5       | 0.82          | -              |
| Soybean oil            | 3         | 1.09          | -              |
| Lard                   | -         | 16.9          | 70             |
| Casein                 | -         | 10.2          | 20             |
| Sucrose                | -         | 14            | -              |
| Maltodextrin           | 0.5       | 2.47          | -              |
| Choline bitartrate     | 0.2       | 0.11          | -              |
| Dietary fiber          | -         | -             | 5.5            |
| Salt                   | 0.4       | 0.4           | 0.38           |
| Lysine                 | 0.75      | 0.41          | 0.7            |
| L-cystine              | 0.5       | 0.55          | 0.38           |
| Mineral mix            | 0.15      | 0.26          | 0.14           |
| Vitamin mix            | 0.2       | 0.2           | 0.19           |
| Calcium hydrophosphate | 1.6       | 1.57          | 1.5            |
| Calcium carbonate      | 1.3       | 1.28          | 1.22           |

Nutrient composition: standard diet: protein (22.1%), carbohydrate (52%), fat (5.28%), fiber (4.12%); high-fat diet: protein (22.3%), carbohydrate (44.6%), fat (19.8%), fiber (2.1%); KD: protein (20%), carbohydrate (0%), fat (70%), fiber (5.5%).

**Supplemental Table 2: Forward and reverse of gene**

| <b>Product size/bp</b> | <b>Gene name</b>  | <b>Primer Sequence (5'to3')</b> |
|------------------------|-------------------|---------------------------------|
| 155                    | AMPK $\alpha$ 1-F | ACCTGACTCTTTCCTGGACG            |
|                        | AMPK $\alpha$ 1-R | AATGCCATTTTGCCTTCCGT            |
| 153                    | AMPK $\alpha$ 2-F | CGCCTCTAGTCCTCCATCAG            |
|                        | AMPK $\alpha$ 2-R | TTGGGCTTCGTTGTGTTGAG            |
| 222                    | ACC1-F            | TGAAGGCTGTGGTGATGGAT            |
|                        | ACC1-R            | CAGTAAGTGTAGGGTCCCGG            |
| 166                    | ACC2-F            | TCTCTGAGGCCAACTGAACC            |
|                        | ACC2-R            | GGTCTCATCTGGCGTTCTCT            |
| 114                    | SCD1-F            | AGAGTAGCTGAGCTTTGGGC            |
|                        | SCD1-R            | GCATCATTAACACCCCGATAGC          |
| 189                    | FASn-F            | AGAGGCTTGTGCTGACTTCC            |
|                        | FASn-R            | CTCCACTCCCGAATGTGCTT            |
| 302                    | Acox1-F           | GCTGAGGAACCTGTGTCTCT            |
|                        | Acox1-R           | TCAAAGGCATCCACCAAAGC            |
| 296                    | Scad-F            | GGGCAAGAAGGAAGACAAGC            |
|                        | Scad-R            | CTCGGCATACTTACAGCAC             |
| 157                    | PPAR $\alpha$ -F  | AGAGGGCTGAGCGTAGGTAA            |
|                        | PPAR $\alpha$ -R  | ATTGGGCCGGTTAAGACCAG            |
| 162                    | PPAR $\gamma$ -F  | CAGGTCAGAGTCGCCCCG              |
|                        | PPAR $\gamma$ -R  | CAGAGTGTGACTTCTCCTCAGC          |
| 83                     | CPT1a-F           | ACGTTGGACGAATCGGAACA            |
|                        | CPT1a-R           | CCATGCAGCAGAGATTTGGC            |
| 173                    | G6PC-F            | GGACCTCCTGTGGACTTTGG            |
|                        | G6PC-R            | TGCTGAGTTCTCCCTTGCAG            |
| 96                     | PCK1-F            | CACTGACCCTCGAGATGTGG            |
|                        | PCK1-R            | CTGAGGCCAGTTTTGGGGAT            |
| 216                    | Glut2-F           | CGTGTTCCTCCTTTCGCTG             |
|                        | Glut2-R           | TGGTCGGTTCCTCGGTTTTA            |
| 315                    | FGF 21-F          | CATACCCCATCCCTGACTCC            |
|                        | FGF 21-R          | TAGAGGCTTTGACACCCAGG            |
| 174                    | FBPase-F          | CAGGGACGTGAAGATGAAGAAGAA        |
|                        | FBPase-R          | TTGTTGGCGGGGTATAAAAAGA          |
| 83                     | $\beta$ -actin-F  | GCAGGAGTACGATGAGTCCG            |
|                        | $\beta$ -actin-R  | GGGTGTAAAACGCAGCTCAG            |
